RESEARCH ARTICLE

# An association of cognitive impairment with diabetes and retinopathy in end stage renal disease patients under peritoneal dialysis

Jin-Lan Liao<sup>1</sup>, Zu-Ying Xiong<sup>1\*</sup>, Zhi-Kai Yang<sup>2</sup>, Li Hao<sup>3</sup>, Gui-Ling Liu<sup>3</sup>, Ye-Ping Ren<sup>4</sup>, Qin Wang<sup>5</sup>, Li-Ping Duan<sup>5</sup>, Zhao-Xia Zheng<sup>5</sup>, Jie Dong<sup>2\*</sup>

**1** Renal Division, Peking University Shenzhen Hospital, Shenzhen, China, **2** Renal Division, Department of Medicine, Peking University First Hospital; Institute of Nephrology, Peking University; Key Laboratory of Renal Disease, Ministry of Health; Key Laboratory of Renal Disease, Ministry of Education, Beijing, China, **3** Renal Division, the Second Hospital of Anhui Medical University, Anhui, China, **4** Renal Division, the Second Affiliated Hospital of Harbin Medical University, Heilongjiang, China, **5** Renal Division, Handan Central Hospital, Hebei, China

\* [jie.dong@bjmu.edu.cn](mailto:jie.dong@bjmu.edu.cn) (JD); [xiongzy2005@163.com](mailto:xiongzy2005@163.com) (ZX)

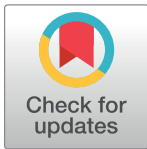

**OPEN ACCESS**

**Citation:** Liao J-L, Xiong Z-Y, Yang Z-K, Hao L, Liu G-L, Ren Y-P, et al. (2017) An association of cognitive impairment with diabetes and retinopathy in end stage renal disease patients under peritoneal dialysis. *PLoS ONE* 12(8): e0183965. <https://doi.org/10.1371/journal.pone.0183965>

**Editor:** Abelardo I Aguilera, Hospital Universitario de la Princesa, SPAIN

**Received:** January 10, 2017

**Accepted:** August 15, 2017

**Published:** August 31, 2017

**Copyright:** © 2017 Liao et al. This is an open access article distributed under the terms of the [Creative Commons Attribution License](https://creativecommons.org/licenses/by/4.0/), which permits unrestricted use, distribution, and reproduction in any medium, provided the original author and source are credited.

**Data Availability Statement:** Data are available from the Peking University First Hospital Institutional Data Access for researchers who meet the criteria for access to confidential data. Data requests can be sent to: Di Xin, [839552981@qq.com](mailto:839552981@qq.com).

**Funding:** The authors received no specific funding for this work.

**Competing interests:** The authors have declared that no competing interests exist.

## Abstract

### Background

Diabetes and retinopathy have been considered as risk factors of cognitive impairment (CI) in previous studies. We investigated both of these two factors and their relationship with global and specific cognitive functions in end stage renal disease patients under peritoneal dialysis (PD).

### Methods

In this multicenter cross-sectional study, 424 clinically stable patients were enrolled from 5 PD units, who performed PD for at least three months and completed funduscopy examination if they had diabetes. Global cognitive function was measured using the Modified Mini-Mental State Examination (3MS), Trail-Making Test forms A and B for executive function, and subtests of the Battery for the Assessment of Neuropsychological Status for immediate and delayed memory, visuospatial skills, and language ability.

### Results

PD Patients with DM and Retinopathy had significantly higher prevalence of CI, executive dysfunction, impaired immediate memory and visuospatial skill, compared with patients in non-DM group. By multivariate logistic regression analyses, DM and retinopathy rather than DM only were significantly associated with increased risk for CI, executive dysfunction, impaired immediate memory and visuospatial skill, odds ratios(ORs) and 95% confidence intervals were 2.09[1.11,3.92], 2.89[1.55,5.37], 2.16 [1.15,4.06] and 2.37[1.32,4.22], respectively (all P < 0.05).

## Conclusions

Diabetic PD patients with retinopathy were at two times risk for overall cognitive impairment, executive dysfunction, impaired immediate memory and visuospatial skill as compared to non-diabetic PD patients.

## Introduction

Peritoneal dialysis (PD) involves complex activities such as self-monitoring, self-care, lifestyle changes and adaptation to dialysis and medication regimens. All above are partly dependent on normal cognitive function [1] [2, 3]. Unfortunately, the prevalence of cognitive impairment is high: 27%–67% among patients with end stage renal disease (ESRD) [1, 4–6]. As cognitive impairment (CI) is an independent predictor of mortality [4] and technical survival [7] in dialysis patients, exploring the risk factors for CI is crucial in this situation.

Diabetes mellitus (DM) is known to be prevalent in chronic kidney disease, i.e. 44% of patients with ESRD as reported by USRDS [8] and 37.3% of Chinese PD patients from our multi-center cohort study [9]. Of note, previous studies have indicated a link of diabetes to an increased risk of CI [10–12]. Diabetic participants with retinopathy perform worse on cognitive tests since retinopathy reflects micro-vascular abnormalities, possibly sharing similar metabolic and inflammatory pathways with CI [13–15].

This is an affiliated study of a multi-center cross-sectional survey on cognitive function in ESRD under PD. Relevant studies were published elsewhere [3, 16–18]. Although our previous data have shown that DM is weakly associated with general and specific CI [3, 17], further analysis on the additional impact of retinopathy on CI for diabetic PD patients has not been performed. To our knowledge, few data has been shown on this association in dialysis population. Therefore, we aimed to explore the relationship between DM, retinopathy and cognitive function in patients on PD.

## Patients and methods

### Patient selection and study design

Data used were pooled from five PD centers (Beijing, Heilongjiang, Hebei, Anhui, and Guangdong) located at 4 geographical regions (north, northwest, east, and south) in China, detailed study design was published at main research [18]. Database from each center were collected within strictly controlled Framework and were further inspected to ensure the integrity and accuracy. All investigators and staff members completed a training program which taught them the study methods and processes. A manual of detailed instructions for data collection was distributed. Also, the study was approved by the ethics committee of Peking University First Hospital. All participating patients signed written agreement for acknowledging their information to be stored on the hospital database and used in research. The investigator had no access information that could identify individual participants during or after data collection.

This study enrolled prevalent PD patients between March 2013 and March 2014. Inclusion criteria for participants were: age  $\geq 18$  years; had been undergoing PD  $\geq 3$  months and clinically stable; able to undergo all measurements and questionnaires as required. Patients were excluded if they had a systemic infection, acute cardiovascular events, active hepatitis, or cancer; had undergone surgery or experienced trauma in the month before the study; had any

study-obstructive conditions (severe eyesight loss, language incompatibility illiteracy, preexisting dementia or confusion, various mental disorders, or upper limb disability); or no referral to ophthalmology and funduscopy examination. All the participants received conventional glucose-based lactate-buffered PD solutions (Ultra bag, Baxter Healthcare, Guangzhou, China).

## Clinical characteristics

Demographics and comorbid conditions were recorded, including age, sex, education level, PD vintage, body mass index (BMI), systolic and diastolic blood pressure, primary kidney disease, the presence of diabetes mellitus (DM), history of cardiovascular disease (CVD) and Charlson index[19]. Mean arterial pressure was calculated. The degree of education was recorded as the highest school level at which a diploma was received (i.e., elementary school or lower, middle school, high school, or above high school). CVD was recorded in at least one of the following conditions: angina, congestive heart failure (New York Heart Association class III-IV), transient ischemic attack, history of myocardial infarction or cerebrovascular accident, and peripheral arterial disease[20]. Cerebrovascular accident was recorded separately.

## Laboratory methods

After overnight fasting while continuing PD therapy, participants had their venous blood sampled for routine and biochemical measurements. Biochemical data (including serum sodium, serum albumin, calcium, phosphate, triglycerides, total cholesterol, high-sensitivity C-reactive protein (hs-CRP), serum hemoglobin A<sub>1c</sub> (HbA<sub>1c</sub>) and hemoglobin) were gathered with an automatic Hitachi chemistry analyzer, and the mean value of measurements taken over the preceding 3 months was calculated. Residual kidney function was defined as the mean of residual creatinine and urea clearance from a 24-hour urine collection. Dialysis adequacy was defined as total Kt/V and creatinine clearance.

## Cognitive function and retinopathy

Overall cognitive function was measured by the modified Mini-Mental State Examination (3MS)[21]. We used a 3MS cutoff point of less than 75 for individuals with less than a high school education and a 3MS cutoff point of less than 80 for individuals with a high school education because the 3MS mean scores vary by education[22]. Specific cognitive functions measured were executive function (by the Trail-Making Test, forms A [Trails A] and B [Trails B]), immediate memory, delayed memory, visuospatial skill, and language ability by subtests of the Repeatable Battery for the Assessment of Neuropsychological Status (RBANS). Executive dysfunction was defined as Trails A score more than 75 seconds and Trails B score more than 180 seconds.[23–25] In addition, subtests of RBANS were adopted to assess immediate memory (list learning and story memory), delayed memory (list recall, list recognition, story recall, and figure recall), visuospatial skill (figure copy), and language ability (picture naming and semantic fluency).[26] The reliability and validity of RBANS have already been established in Shanghai and Beijing populations [27, 28]. Raw scores were transferred to age-standardized T scores for all subtests of RBANS. T scores less than 1 standard deviation below the published mean in an education-grouped Chinese population were identified as impair for each test.[29] Neurocognitive battery was assessed after patients had a meal just in case of hypoglycemia.

Participants were referred to the ophthalmologist, and examined with funduscopy after mydriasis if they had diabetes. We collected their final diagnosis on retinopathy and registered it to the Charlson comorbidity index. Definition of retinopathy is an ocular manifestation of systemic disease as seen in diabetes or hypertension [30]. The retinal changes included classic

retinal vascular changes in diabetes and hypertension (i.e., diabetic and hypertensive retinopathy), isolated retinopathy signs in individuals with diabetes or hypertension (e.g., microaneurysm, retinal hemorrhage, or cotton wool spot).

## Statistical analysis

Continuous data were presented as mean  $\pm$  standard deviation except for PD vintage, residual kidney function, and hs-CRP level, which were presented as median with interquartile range due to high skew. Categorical variables were presented as proportions. Patients were divided into 3 groups: non-diabetes mellitus (non-DM), DM with or without retinopathy. One-way analysis of variance, or  $\chi^2$  was used to compare differences in demographic and biochemistry data and parameters of general and specific cognitive function between groups.

The effects of DM with or without retinopathy on overall and specific CI were examined respectively by using multivariable logistic regression analysis adjusting for recognized confounders. Three models of logistic regression analysis models were built to examine whether DM with or without retinopathy could correlate to the risk of cognitive impairment, executive dysfunction, impaired immediate and delayed memory, visuospatial skill, and language ability, respectively. Model1 included demographic data (age, sex, education level, BMI, DM with retinopathy). Model2 involved Model1 and laboratory parameters (serum albumin, sodium, total cholesterol, hs-CRP, and residual kidney function). Model 3 contained Model1 and Model2 plus cerebrovascular disease. All probabilities were two-tailed, and the level of significance was set at 0.05. Odds ratios (ORs) and 95% confidence intervals were calculated. Statistical analysis was performed using SPSS for Windows software, version 20.0 (SPSS Inc.).

## Results

### Basic characteristics

Among 667 patients screened for enrollment, 495(74.2%) gave consent and 71(14.3%) did not meet eligibility criteria, leaving 424(85.7%) patients who had cognitive testing and performed fundus examination (Fig 1). Demographic and laboratory results for our participants were slightly different with our previous study because the sample size [3, 17, 18]. The basic data was in accordance with general characteristics of the PD population in China [27]. For instance, these enrolled patients had a mean age of  $52.7 \pm 14.3$  years, PD vintages of  $33.2 \pm 27.5$  months, BMI of  $22.9 \pm 3.4$  kg/m<sup>2</sup>, serum albumin of  $36.0 \pm 5.5$  g/L, and serum hemoglobin A1C (HbA1C) of  $6.3 \pm 1.0\%$ . Among these patients, 72.4% were non-diabetic, 8.5% were diabetes only, and 19.1% were diabetes with retinopathy, 21.9% had a history of CVD, 9.3% had a history of cerebrovascular accident (Table 1).

### Clinical characteristics according to DM and retinopathy

As shown in Table 1, diabetic patients with or without retinopathy were prone to be older, male, having higher proportion of cardiovascular disease and cerebrovascular accident, and higher BMI, hemoglobin, triglycerides level, and lower MAP levels as compared to non-diabetic patients. There were no significant differences in demographic and biochemistry data between DM only and DM with retinopathy groups (all  $P < 0.05$ ). Although the Kt/V values differed between non-DM and DM group, dialysis adequacy was clinically acceptable for both.

### DM, retinopathy and cognitive function

Among all 424 subjects, the prevalence of CI was 27.4%. As compared to non-DM group, patients with diabetes and retinopathy had significantly lower scores for 3MS, immediate

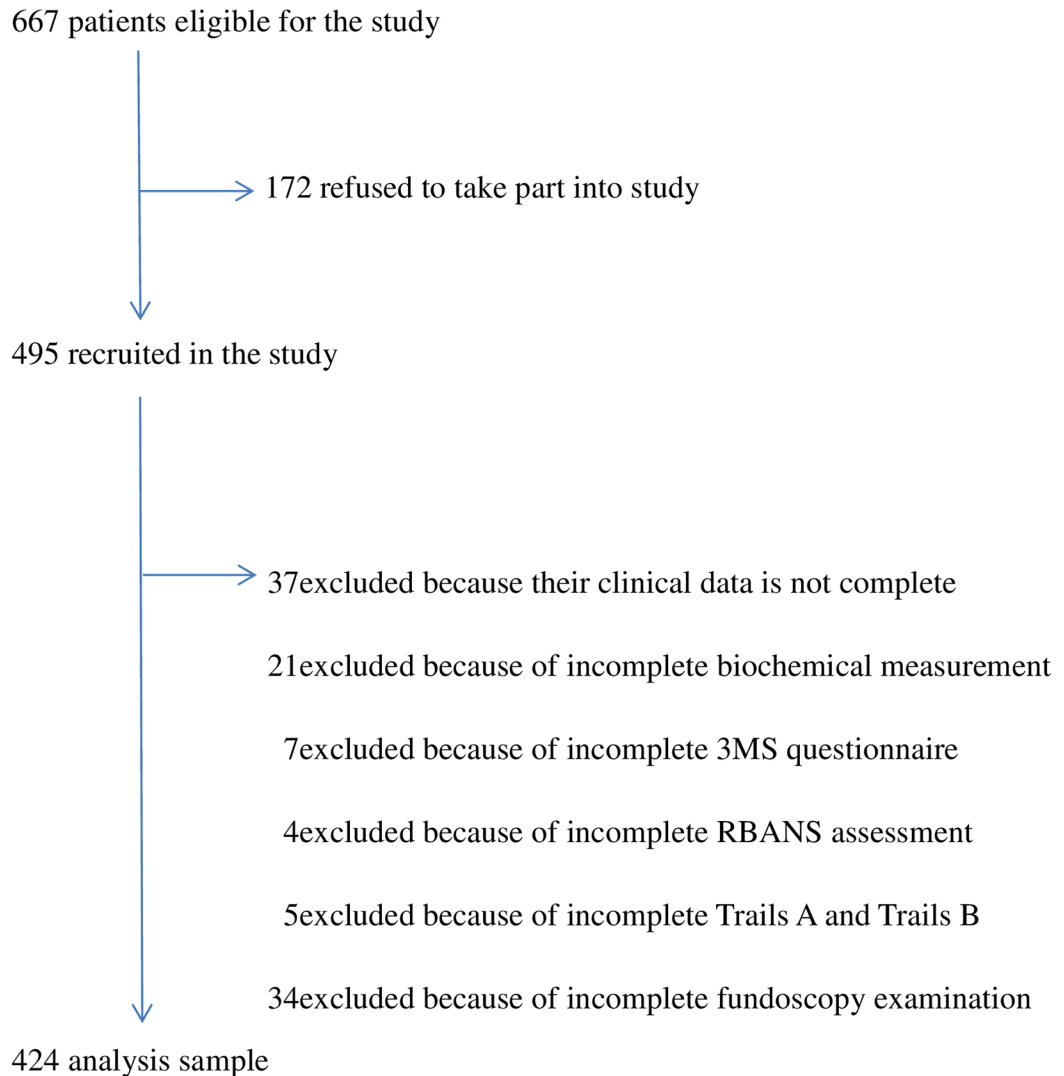

(This flow diagram reporting the various steps of inclusion and exclusion, and final analysis, with the total number of patients lost.)

**Fig 1. Selection and exclusion process of participants.**

<https://doi.org/10.1371/journal.pone.0183965.g001>

memory and visuospatial function, and longer completion time on executive tests. Accordingly, they had significantly higher prevalence of cognitive impairment, executive dysfunction, impaired immediate memory and visuospatial skill than non-DM patients (Table 2). However, diabetic patients did not perform worse in overall and specific cognitive function than non-diabetic patient. The scores for delayed memory and language ability were not significantly different between groups (Table 2).

We further determined whether DM with or without retinopathy was associated with an increased risk of cognitive decline in PD patients (Table 3). In Model 1, DM with retinopathy was significantly associated with increased risk for CI, executive dysfunction, impaired immediate memory and visuospatial skill, the odds ratios(ORs) and 95% confidence intervals were 2.09[1.11,3.92], 2.89[1.55,5.37], 2.16 [1.15,4.06] and 2.37[1.32,4.22], respectively (all  $P < 0.05$ ).

**Table 1. Clinical characteristics according to diabetes and retinopathy.**

| Variables                                                | Total        | non DM                  | DM           | DM and Retinopathy      | P      |
|----------------------------------------------------------|--------------|-------------------------|--------------|-------------------------|--------|
| No. of patients                                          | 424 (100%)   | 307 (72.4%)             | 36(8.5%)     | 81 (19.1%)              | —      |
| Age, y                                                   | 52.7 y4.3    | 50.1 y5.1 <sup>c</sup>  | 61.0 y.1     | 58.8 y.3 <sup>e</sup>   | <0.001 |
| Male sex                                                 | 217(51.2%)   | 147(47.9%) <sup>b</sup> | 26(72.2%)    | 44(54.3%)               | 0.02   |
| PD vintage, months                                       | 33.2intag    | 34.0intag               | 27.0intag    | 32.1intag               | 0.31   |
| Cardiovascular disease                                   | 93 (21.9%)   | 53(17.3%) <sup>a</sup>  | 12(33.3%)    | 28(34.6%) <sup>d</sup>  | 0.001  |
| Cerebrovascular accident                                 | 38(9.3%)     | 22(7.5%)                | 2(6.1%)      | 14(17.3%) <sup>d</sup>  | 0.02   |
| Level of education                                       |              |                         |              |                         | 0.2    |
| ≤Elementary school                                       | 84(19.8%)    | 64(20.8%)               | 4(11.1%)     | 16(19.8%)               |        |
| Middle school                                            | 124(29.2%)   | 88(28.7%)               | 11(30.6%)    | 25(30.9%)               |        |
| High School                                              | 123(29.0%)   | 80(26.1%)               | 15(41.7%)    | 28(34.6%)               |        |
| >High school                                             | 93(21.9%)    | 75(24.4%)               | 6(16.7%)     | 12(14.8%)               |        |
| BMI, kg/m <sup>2</sup>                                   | 22.9±3.4     | 22.5±3.4 <sup>a</sup>   | 23.9±3.4     | 24.1±3.4 <sup>e</sup>   | <0.001 |
| MAP, mmHg                                                | 99.9 mmHg    | 101.3mmHg <sup>0</sup>  | 96.73mmH     | 96.33mmHg <sup>d</sup>  | <0.001 |
| Hemoglobin, g/L                                          | 104.2lobin   | 102.3lobin              | 108.2lobin   | 109.8lobin <sup>d</sup> | <0.001 |
| HbA1C, %                                                 | 6.31C,       | 6.01C, <sup>a</sup>     | 6.41C,       | 6.61C, % <sup>d</sup>   | <0.01  |
| Serum albumin, g/L                                       | 36.0m al     | 35.7m5.9                | 36.9m5.9     | 36.5m5.9                | 0.27   |
| Triglyceride, mmol/L                                     | 2.0glyc      | 1.8glyc                 | 2.1glyc      | 2.0glyc                 | 0.2    |
| Total cholesterol, mmol/L                                | 4.8al c      | 4.7al c                 | 4.9al c      | 4.9al c                 | 0.57   |
| Serum sodium, mmol/L                                     | 139.0 sod    | 139.3 sod               | 138.2 sod    | 138.6 sod               | 0.05   |
| Calcium, mmol/L                                          | 2.3cium      | 2.3cium                 | 2.2cium      | 2.3cium                 | 0.07   |
| Phosphate, mmol/L                                        | 1.7spha      | 1.7spha                 | 1.7spha      | 1.7spha                 | 0.99   |
| hs-CRP,mg/L                                              | 3.2[1.1,8.7] | 2.9 [0.9,8.4]           | 2.6[1.3,8.1] | 4.0[1.7,12.1]           | 0.67   |
| Residual kidney function, ml/min/per 1.73 m <sup>2</sup> | 2.0[0.0,6.0] | 2.0[0.0,5.9]            | 2.5[0.0,7.7] | 1.1[0.0,5.2]            | 0.1    |
| Total Kt/V                                               | 1.9al K      | 1.9al K                 | 1.8al K      | 1.8al K                 | 0.01   |
| Total CLcr, L/wk/1.73 m <sup>2</sup>                     | 58.2l CLc    | 58.7l CLc               | 59.1l CLc    | 56.1l CLc               | 0.48   |

Values for categorical variables are given as number (percentage); values for continuous variables, as mean± standard deviation or median. [Interquartile range]. Abbreviations: BMI, body mass index; CLcr, creatinine clearance per week; DM, diabetes mellitus; hs-CRP, high-sensitivity C-reactive protein; Kt/V, urea clearance per week; MAP, mean arterial pressure; PD, peritoneal dialysis

<sup>a</sup> P<0.05,

<sup>b</sup> P <0.01,

<sup>c</sup> P<0.001, non DM group vs. DM group;

<sup>d</sup> P<0.01,

<sup>e</sup> P<0.001, non DM group vs. DM and Retinopathy group

<https://doi.org/10.1371/journal.pone.0183965.t001>

After adjusting for demographic and additionally clinical parameters or comorbid data, this result did not weaken, the OR values of DM and retinopathy which to be indicated executive dysfunction and impaired immediately memory was approximately (Fig 2). DM only did not show any influence on the global or specific cognitive impairment.

## Discussion

The main findings of our current study showed that DM with retinopathy was associated with worse performance on cognitive function than non-DM group, including overall cognitive function, executive function, immediate memory and visuospatial skill rather than delayed memory and language ability. Diabetic patients without retinopathy performed similarly on overall and specific cognitive function as compared to non-diabetic patients although they were older, having higher BMI and HbA1C level.

**Table 2. Cognitive function parameters according to diabetes and retinopathy disease.**

| Variables                          | Total       | non DM      | DM                     | DM and Retinopathy       | P      |
|------------------------------------|-------------|-------------|------------------------|--------------------------|--------|
| <b>N (%)</b>                       | 424         | 307(72.4%)  | 36 (8.5%)              | 81(19.1%)                | —      |
| <b>3MS score</b>                   | 83.4score   | 84.3score   | 85.5score <sup>f</sup> | 79.1score <sup>d</sup>   | 0.004  |
| <b>Cognitive impairment</b>        | 113(27.4%)  | 72(24.2%)   | 7(21.2%) <sup>g</sup>  | 34(42%) <sup>d</sup>     | 0.004  |
| <b>Trails A,s</b>                  | 88.1ls A,   | 82.0ls A,   | 92.6ls A,              | 109.9s A,s <sup>d</sup>  | 0.008  |
| <b>Trails B,s</b>                  | 207.4s B,s1 | 191.8s B,s3 | 204.9s B,s             | 268.0s B,s1 <sup>e</sup> | 0.001  |
| <b>Executive dysfunction</b>       | 127(32%)    | 73(25.2%)   | 13(41.9%)              | 41(53.9%) <sup>e</sup>   | <0.001 |
| <b>Immediate memory score</b>      | 73.1diate   | 74.9diate   | 70.0diate              | 67.7diate <sup>d</sup>   | 0.003  |
| <b>Impaired immediate memory</b>   | 275(67.2%)  | 185(62.7%)  | 26(76.5%)              | 64(80.0%) <sup>d</sup>   | 0.007  |
| <b>Delayed memory score</b>        | 88.6yed m   | 88.9yed m   | 89.4yed m              | 87.0yed m                | 0.66   |
| <b>Impaired delayed memory</b>     | 83(21.3%)   | 62(21.8%)   | 7(22.6%)               | 14(18.9%)                | 0.85   |
| <b>Language ability score</b>      | 92.4uage    | 93.2uage    | 92.4uage               | 89.2uage                 | 0.08   |
| <b>Impaired language ability</b>   | 69(16.8%)   | 43(14.5%)   | 8(23.5%)               | 18(22.5%)                | 0.13   |
| <b>Visuospatial skill score</b>    | 85.2ospat   | 87.8ospat   | 84.3ospat              | 75.6ospat <sup>e</sup>   | <0.001 |
| <b>Impaired visuospatial skill</b> | 194(48.9%)  | 129(44.3%)  | 16(51.6%)              | 49(65.3%) <sup>d</sup>   | 0.005  |

<sup>d</sup> P<0.01,

<sup>e</sup> P<0.001, non DM group vs. DM and Retinopathy group;

<sup>f</sup> P<0.05,

<sup>g</sup> P<0.01, DM group vs. DM and Retinopathy group

<https://doi.org/10.1371/journal.pone.0183965.t002>

**Table 3. The effect of diabetes and retinopathy on impaired cognitive function by multivariable logistic analysis.**

| Variables                          | Model 1                  |       | Model 2                  |       | Model 3                  |       |
|------------------------------------|--------------------------|-------|--------------------------|-------|--------------------------|-------|
|                                    | OR                       | P     | OR                       | P     | OR                       | P     |
|                                    | (95%confidence interval) |       | (95%confidence interval) |       | (95%confidence interval) |       |
| <b>Cognitive impairment</b>        |                          |       |                          |       |                          |       |
| DM                                 | 0.84(0.31,2.31)          | 0.74  | 0.82(0.29,2.30)          | 0.709 | 0.85(0.30,2.39)          | 0.76  |
| DM and Retinopathy                 | 2.09(1.11,3.92)          | 0.022 | 2.19(1.13,4.26)          | 0.021 | 2.15(1.10,4.20)          | 0.03  |
| <b>Executive dysfunction</b>       |                          |       |                          |       |                          |       |
| DM                                 | 1.78(0.73,4.35)          | 0.206 | 1.71(0.68,4.31)          | 0.259 | 1.79(0.71,4.53)          | 0.22  |
| DM and Retinopathy                 | 2.89(1.55,5.37)          | 0.001 | 2.88(1.51,5.52)          | 0.001 | 2.82(1.46,5.42)          | 0.002 |
| <b>Impaired immediate memory</b>   |                          |       |                          |       |                          |       |
| DM                                 | 1.85(0.78,4.42)          | 0.164 | 1.74(0.71,4.22)          | 0.22  | 1.86(0.76,4.54)          | 0.17  |
| DM and Retinopathy                 | 2.16(1.15,4.06)          | 0.016 | 2.17(1.13,4.20)          | 0.02  | 2.05(1.05,3.98)          | 0.04  |
| <b>Impaired delayed memory</b>     |                          |       |                          |       |                          |       |
| DM                                 | 1.12(0.43,2.95)          | 0.81  | 1.03(0.40,2.79)          | 0.954 | 1.04(0.38,2.82)          | 0.94  |
| DM and Retinopathy                 | 0.71(0.35,1.44)          | 0.347 | 0.59(0.59,1.28)          | 0.169 | 0.57(0.27,1.21)          | 0.14  |
| <b>Impaired language ability</b>   |                          |       |                          |       |                          |       |
| DM                                 | 1.93(0.77,4.82)          | 0.159 | 1.91(0.72,5.09)          | 0.196 | 1.81(0.64,5.12)          | 0.19  |
| DM and Retinopathy                 | 1.68(0.87,3.23)          | 0.121 | 1.86(0.93,3.74)          | 0.081 | 1.81(0.90,3.65)          | 0.1   |
| <b>Impaired visuospatial skill</b> |                          |       |                          |       |                          |       |
| DM                                 | 1.34(0.60,2.99)          | 0.474 | 1.50(0.64,3.50)          | 0.347 | 1.508(0.65,3.52)         | 0.34  |
| DM and Retinopathy                 | 2.37(1.32,4.22)          | 0.004 | 2.60(1.41,4.79)          | 0.002 | 2.58(1.40,4.77)          | 0.002 |

Model 1: age, sex, education level, BMI, DM and retinopathy; Model 2: Model 1 plus serum albumin level, sodium level, total cholesterol level, high-sensitivity C-reactive protein level, and residual kidney function; Model3: Model 2 plus cerebrovascular disease; Abbreviations: OR: odd ratio.

<https://doi.org/10.1371/journal.pone.0183965.t003>

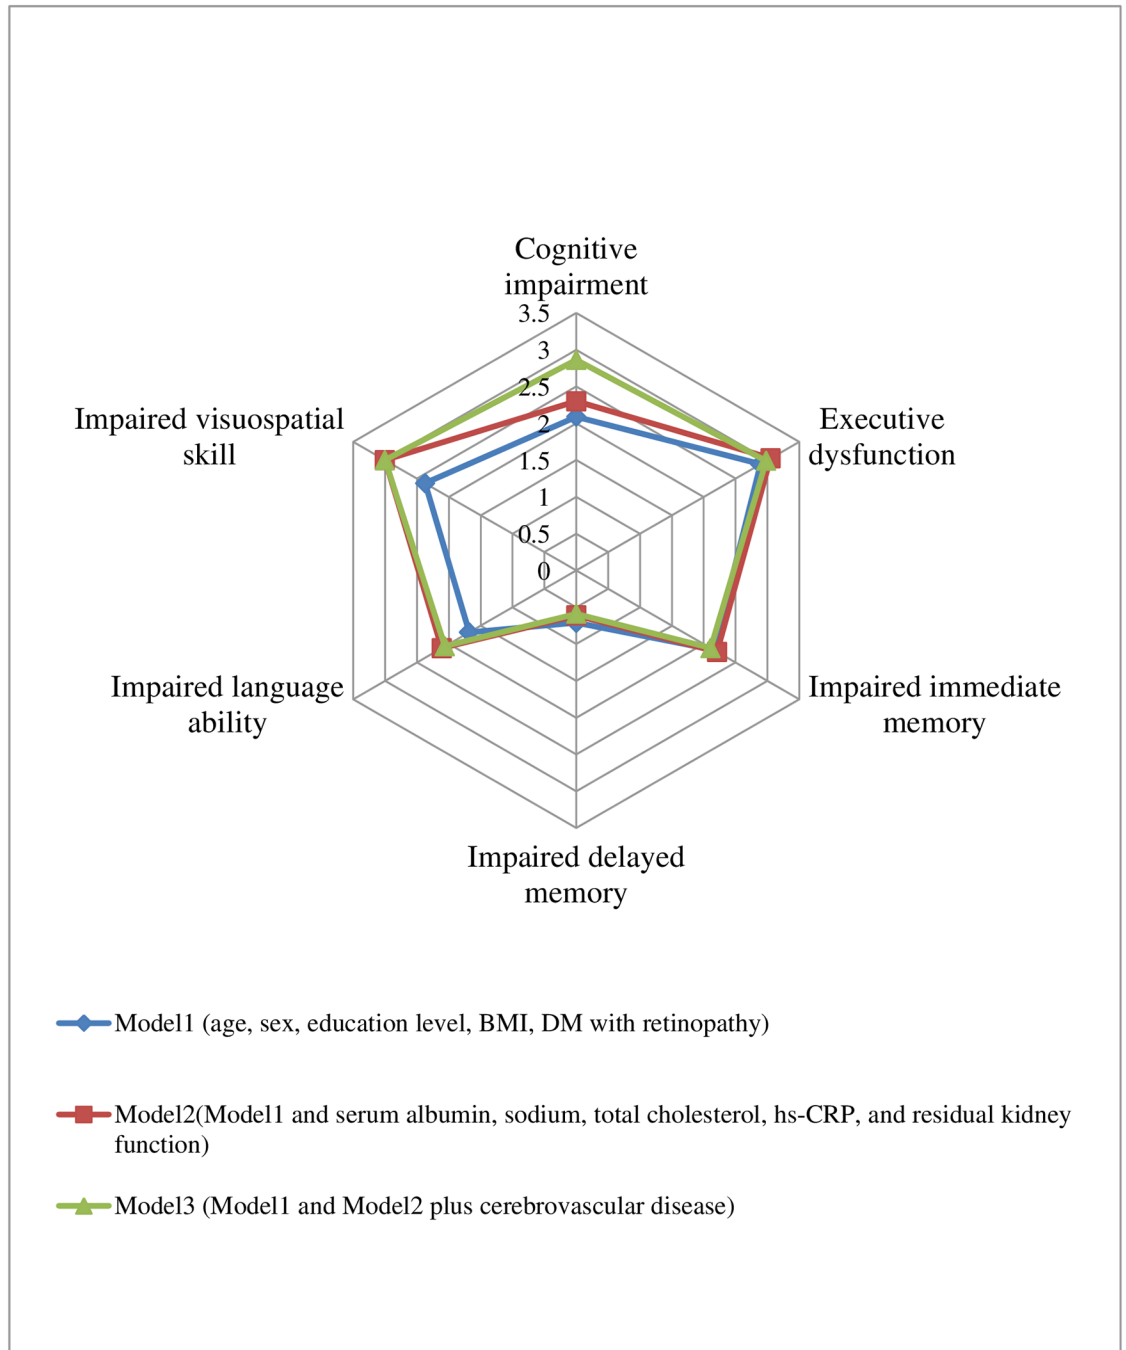

**Fig 2. Comparison odd ratio values of DM and retinopathy in three models.**

<https://doi.org/10.1371/journal.pone.0183965.g002>

As shown in prospectively longitudinal studies, there is an association of diabetes with the onset of dementia and CI as compared with those without diabetes [11, 12]. Yet in our study, PD patients with diabetes did not perform worse than non-diabetes on global and special cognitive function after multivariate adjustment. There are several possible reasons for the result. First, multiple risk factors in relation to ESRD, such as inflammation, endothelial dysfunction, atherosclerosis, vascular calcification and hyperhomocysteinemia [31–35], also play roles in



the development and progression of CI. The accumulation of advanced glycosylation end products triggers vascular endothelial dysfunction, increases permeability of blood vessels and causes hardening [36–38]; by which the mechanisms correlate with CI in T2DM may react in ESRD patients under PD [39–41]. PD vintage of non-DM group was longer than DM group in our subject; this can be interpreted as the hypothesis that historical glucose exposure of non-DM group was not low. Under these circumstances, the influence of DM only on the risk for CI might be weak in this population. This phenomenon is also in accordance with our previous data indicating diabetic without inflammation had comparable survival rate as compared to non-diabetic PD patients[9]. Second, the proportion of diabetic PD patients without retinopathy just presented to be 8.5%, which was significantly lower than that in a previous study from a western PD population (41%)[1]. Therefore, we cannot preclude the possibility that sample size of our study is not large enough to reject the null hypothesis. Third, patients with acute comorbidities or any study-obstructive conditions were excluded from this study. It is possible that frail individuals with DM or the imminent dropout cases were not examined with cognitive function based on this cross-sectional dataset. To clarify this issue, the further longitudinal study with large sample size to explore the risk of DM on new onset CI should be performed in dialysis population.

The risk of CI significantly increased in patients with DM and retinopathy in this study. They were comparatively older and having higher BMI, higher proportion of cerebrovascular and cardiovascular comorbidities, poor glucose controlled as compared to non-diabetic patients. All above are risk factors of CI, which performed worse as DM, combined with retinopathy rather than DM only. In addition, recent studies have showed a significantly independent effect of retinopathy on CI. There was a near threefold increased risk of CI after coronary artery bypass grafting in patients with diabetic retinopathy compared to those without [42]. More recently, Chronic Renal Insufficiency Cohort (CRIC) Study also indicated that the odds of CI on executive function, attention, and naming were 2–3 times higher in CKD patients with retinopathy than those without [43]. This association reflects the possible homology between retinal and cerebral microvasculature and the potential role of vascular injury in cognitive decline. Ono and colleagues reported that retinal circulation may be an indicator of cerebrovascular circulation[44] since the retina develops from the forebrain, their share similar embryological origin, size, structure and physiological characteristics (including the blood-brain and blood-retinal barrier)[45, 46]. However, when we included cerebrovascular disease as confounding factors into the model, the effect of DM and retinopathy on the risk for CI was limited changed. This finding needs to be further explored to determine whether retinopathy has an independent effect, not related to cerebrovascular disease, on the occurrence of CI. Based on the data, it inspired us that use of screening cognitive tests may be considered as a relatively simple and non-invasive assessment to provide a unique ‘window’ to detect a potential decline in cognitive function for the dialysis patient.

The strengths of our study included not only an extensive battery of six cognitive tests to assess impairment on multiple cognitive domains, but also the first multicenter study to examine the relationship between DM, retinopathy and cognitive impairment among PD patients. Most recognized confounders were taken into account into multivariate regression models to analyze the independent association of DM, retinopathy and CI.

However, the study was not without limitations. First of all, we did not use standardized photographic evaluation of retinal images to ascertain and grading retinopathy lesions [46–50]. The association of retinopathy in varying degree and CI could not be determined. Secondly, we did not measure visual acuity, which was shown to be associated with poor cognitive test scores in older people [51]. Executive function (the Trails A and Trails B), and some items in 3MS require adequate sight to provide a valid measurement of cognitive function. Although

we excluded the patients with severe eyesight loss, it remained a question whether the results were confounded by concurrent changes in lens opacity, visual acuity, or contrast sensitivity in individuals with retinopathy[52]. Thirdly, in spite of our study population was consistent with the previous series studies [3, 17, 18], but selection criteria were varied for the study purposes. It was inevitable that the slight differences of experimental parameters, which were due to the different sample size and grouping. Last but not the least, one important confounding factor in the relationship between DM, retinopathy and CI was cerebrovascular disease, which was drawn from the Charlson Index rather than an objective examination such as computer tomography or magnetic resonance imaging of brain. This would result in the underestimation for the prevalence of cerebrovascular disease. However, these limitations would not lead to a reject to a null hypothesis.

In summary, we observed that diabetic PD patients with retinopathy met with two times risk for overall cognitive impairment, executive dysfunction, impaired immediate memory and visuospatial skill than non-diabetic PD patients. By contrast, diabetic PD patients without retinopathy performed comparable general and specific cognitive function. Although we could not determine whether retinopathy is a pathogenic factor of CI due to the nature of this cross-sectional study, our initial findings indicated the association of cognitive impairment with diabetes and retinopathy in PD population. Given the possible prognostic importance of retinopathy in relation to cognitive dysfunction in PD patients, further research to elucidate causes of these signs is needed.

## Supporting information

**S1 File. Figure file quality report: 2017-07-19.**  
(PDF)

**S2 File. PLOS ONE clinical studies checklist.**  
(DOCX)

**S3 File. STROBE statement.**  
(DOCX)

## Acknowledgments

The authors gratitude the patients, physicians, and nursing staff of the PD Centers of Peking University First Hospital, Peking University Shenzhen Hospital, Second Hospital of Anhui Medical University, Second Affiliated Hospital of Harbin Medical University, and Handan Central Hospital, who participated in this study.

## Author Contributions

**Conceptualization:** Jin-Lan Liao, Zu-Ying Xiong, Jie Dong.

**Data curation:** Jin-Lan Liao, Zu-Ying Xiong, Zhi-Kai Yang, Li Hao, Gui-Ling Liu, Ye-Ping Ren, Qin Wang, Li-Ping Duan, Zhao-Xia Zheng, Jie Dong.

**Formal analysis:** Jin-Lan Liao.

**Investigation:** Jin-Lan Liao, Zu-Ying Xiong, Zhi-Kai Yang, Li Hao, Gui-Ling Liu, Ye-Ping Ren, Qin Wang, Li-Ping Duan, Zhao-Xia Zheng, Jie Dong.

**Methodology:** Jin-Lan Liao, Zu-Ying Xiong, Jie Dong.

**Project administration:** Zu-Ying Xiong, Jie Dong.

**Resources:** Jin-Lan Liao, Zu-Ying Xiong, Zhi-Kai Yang, Li Hao, Gui-Ling Liu, Ye-Ping Ren, Qin Wang, Li-Ping Duan, Zhao-Xia Zheng, Jie Dong.

**Software:** Jin-Lan Liao, Zu-Ying Xiong, Zhi-Kai Yang, Li Hao, Gui-Ling Liu, Ye-Ping Ren, Qin Wang, Zhao-Xia Zheng, Jie Dong.

**Supervision:** Zu-Ying Xiong, Jie Dong.

**Validation:** Jin-Lan Liao, Zu-Ying Xiong, Zhi-Kai Yang, Li Hao, Gui-Ling Liu, Ye-Ping Ren, Qin Wang, Li-Ping Duan, Zhao-Xia Zheng, Jie Dong.

**Visualization:** Jin-Lan Liao, Zu-Ying Xiong.

**Writing – original draft:** Jin-Lan Liao.

**Writing – review & editing:** Jin-Lan Liao, Zu-Ying Xiong, Jie Dong.

## References

1. Kalirao P, Pederson S, Foley RN, Kolste A, Tupper D, Zaun D, et al. Cognitive impairment in peritoneal dialysis patients. *Am J Kidney Dis*. 2011; 57(4):612–20. <https://doi.org/10.1053/j.ajkd.2010.11.026> PMID: 21295896.
2. Feil DG, Zhu CW, Sultzer DL. The relationship between cognitive impairment and diabetes self-management in a population-based community sample of older adults with Type 2 diabetes. *J Behav Med*. 2012; 35(2):190–9. <https://doi.org/10.1007/s10865-011-9344-6> PMID: 21503710.
3. Li Y, Tian X, Xiong ZY, Liao JL, Hao L, Liu GL, et al. Performance of the Modified Mini-Mental State Examination (3MS) in Assessing Specific Cognitive Function in Patients Undergoing Peritoneal Dialysis. *PLoS One*. 2016; 11(12):e0166470. <https://doi.org/10.1371/journal.pone.0166470> PMID: 27911914.
4. Griva K, Stygall J, Hankins M, Davenport A, Harrison M, Newman SP. Cognitive impairment and 7-year mortality in dialysis patients. *Am J Kidney Dis*. 2010; 56(4):693–703. <https://doi.org/10.1053/j.ajkd.2010.07.003> PMID: 20800327.
5. Murray AM, Tupper DE, Knopman DS, Gilbertson DT, Pederson SL, Li S, et al. Cognitive impairment in hemodialysis patients is common. *Neurology*. 2006; 67(2):216–23. <https://doi.org/10.1212/01.wnl.0000225182.15532.40> PMID: 16864811.
6. Pereira AA, Weiner DE, Scott T, Sarnak MJ. Cognitive function in dialysis patients. *Am J Kidney Dis*. 2005; 45(3):448–62. <https://doi.org/10.1053/j.ajkd.2004.10.024> PMID: 15754267.
7. Kurella M, Mapes DL, Port FK, Chertow GM. Correlates and outcomes of dementia among dialysis patients: the Dialysis Outcomes and Practice Patterns Study. *Nephrol Dial Transplant*. 2006; 21(9):2543–8. <https://doi.org/10.1093/ndt/gfl275> PMID: 16751655.
8. ESRD in the United States: An Overview of USRDS Annual Data Report Volume 2. *American Journal of Kidney Diseases*. 2015; 66(1):S79–S92. <https://doi.org/10.1053/j.ajkd.2015.04.025>
9. Xu R, Han Q, Zhu T, Ren Y, Chen J, Zhao H, et al. Diabetic patients could do as well as non-diabetic patients without inflammation on peritoneal dialysis. *PLoS One*. 2013; 8(11):e80486. <https://doi.org/10.1371/journal.pone.0080486> PMID: 24260402.
10. Cheng G, Huang C, Deng H, Wang H. Diabetes as a risk factor for dementia and mild cognitive impairment: a meta-analysis of longitudinal studies. *Intern Med J*. 2012; 42(5):484–91. <https://doi.org/10.1111/j.1445-5994.2012.02758.x> PMID: 22372522.
11. Luchsinger JA, Reitz C, Patel B, Tang MX, Manly JJ, Mayeux R. Relation of diabetes to mild cognitive impairment. *Arch Neurol*. 2007; 64(4):570–5. <https://doi.org/10.1001/archneur.64.4.570> PMID: 17420320.
12. Roberts RO, Knopman DS, Geda YE, Cha RH, Pankratz VS, Baertlein L, et al. Association of diabetes with amnesic and nonamnesic mild cognitive impairment. *Alzheimers Dement*. 2014; 10(1):18–26. <https://doi.org/10.1016/j.jalz.2013.01.001> PMID: 23562428.
13. Crosby-Nwaobi R, Sivaprasad S, Forbes A. A systematic review of the association of diabetic retinopathy and cognitive impairment in people with Type 2 diabetes. *Diabetes Res Clin Pract*. 2012; 96(2):101–10. <https://doi.org/10.1016/j.diabres.2011.11.010> PMID: 22154373.
14. Ong SY, Cheung CY, Li X, Lamoureux EL, Ikram MK, Ding J, et al. Visual impairment, age-related eye diseases, and cognitive function: the Singapore Malay Eye study. *Arch Ophthalmol*. 2012; 130(7):895–900. <https://doi.org/10.1001/archophthalmol.2012.152> PMID: 22410630.

15. Ding J, Strachan MW, Reynolds RM, Frier BM, Deary IJ, Fowkes FG, et al. Diabetic retinopathy and cognitive decline in older people with type 2 diabetes: the Edinburgh Type 2 Diabetes Study. *Diabetes*. 2010; 59(11):2883–9. <https://doi.org/10.2337/db10-0752> PMID: 20798334.
16. Liu GL, Pi HC, Hao L, Li DD, Wu YG, Dong J. Vitamin D Status Is an Independent Risk Factor for Global Cognitive Impairment in Peritoneal Dialysis Patients. *PLoS One*. 2015; 10(12):e0143782. <https://doi.org/10.1371/journal.pone.0143782> PMID: 26630385.
17. Xu R, Pi HC, Xiong ZY, Liao JL, Hao L, Liu GL, et al. Hyponatremia and Cognitive Impairment in Patients Treated with Peritoneal Dialysis. *Clin J Am Soc Nephrol*. 2015; 10(10):1806–13. <https://doi.org/10.2215/CJN.02240215> PMID: 26231192.
18. Dong J, Pi HC, Xiong ZY, Liao JL, Hao L, Liu GL, et al. Depression and Cognitive Impairment in Peritoneal Dialysis: A Multicenter Cross-sectional Study. *Am J Kidney Dis*. 2016; 67(1):111–8. <https://doi.org/10.1053/j.ajkd.2015.06.025> PMID: 26255306.
19. Charlson ME, Hollenberg JP, Hou J, Cooper M, Pochapin M, Pecker M. Realizing the potential of clinical judgment: a real-time strategy for predicting outcomes and cost for medical inpatients. *Am J Med*. 2000; 109(3):189–95. PMID: 10974180.
20. Smith SC Jr., Jackson R, Pearson TA, Fuster V, Yusuf S, Faergeman O, et al. Principles for national and regional guidelines on cardiovascular disease prevention: a scientific statement from the World Heart and Stroke Forum. *Circulation*. 2004; 109(25):3112–21. <https://doi.org/10.1161/01.CIR.0000133427.35111.67> PMID: 15226228.
21. Teng EL, Chui HC. The Modified Mini-Mental State (3MS) examination. *The Journal of clinical psychiatry*. 1987; 48(8):314–8. PMID: 3611032.
22. Kurella M, Chertow GM, Fried LF, Cummings SR, Harris T, Simonsick E, et al. Chronic kidney disease and cognitive impairment in the elderly: the health, aging, and body composition study. *Journal of the American Society of Nephrology: JASN*. 2005; 16(7):2127–33. <https://doi.org/10.1681/ASN.2005010005> PMID: 15888561.
23. Yeudall LT, Reddon JR, Gill DM, Stefanyk WO. Normative data for the Halstead-Reitan neuropsychological tests stratified by age and sex. *Journal of clinical psychology*. 1987; 43(3):346–67. PMID: 3597789.
24. Roy M, Molnar F. Systematic review of the evidence for Trails B cut-off scores in assessing fitness-to-drive. *Canadian geriatrics journal: CGJ*. 2013; 16(3):120–42. <https://doi.org/10.5770/cgj.16.76> PMID: 23983828.
25. Shavit L, Mikeladze I, Torem C, Slotki I. Mild hyponatremia is associated with functional and cognitive decline in chronic hemodialysis patients. *Clinical nephrology*. 2014; 82(5):313–9. <https://doi.org/10.5414/CN108335> PMID: 25161116.
26. Randolph C, Tierney MC, Mohr E, Chase TN. The Repeatable Battery for the Assessment of Neuropsychological Status (RBANS): preliminary clinical validity. *Journal of clinical and experimental neuropsychology*. 1998; 20(3):310–9. <https://doi.org/10.1076/jcen.20.3.310.823> PMID: 9845158.
27. Xu R, Han QF, Zhu TY, Ren YP, Chen JH, Zhao HP, et al. Impact of individual and environmental socioeconomic status on peritoneal dialysis outcomes: a retrospective multicenter cohort study. *PloS one*. 2012; 7(11):e50766. <https://doi.org/10.1371/journal.pone.0050766> PMID: 23226378.
28. Zhang BH TY, Zhang WF, et al. <The reliability and validity of the Repeatable Battery for the Assessment of Neuropsychological Status.pdf>. *Chinese Mental Health J*. 2008;2008; 22(12):865–869.
29. Yang GG TJ, Tan YL, et al. <The application performance of the Repeatable Battery for the Assessment of Neuropsychological Status among normal persons in Beijing.pdf>. *Chinese Mental Health J*. 2010;2010; 24(12):926–930.
30. Ophthalmology AAo. *Retina and Vitreous 2011–2012: Amer Academy of Ophthalmology*; 2011.
31. Kurella Tamura M, Wadley V, Yaffe K, McClure LA, Howard G, Go R, et al. Kidney function and cognitive impairment in US adults: the Reasons for Geographic and Racial Differences in Stroke (REGARDS) Study. *Am J Kidney Dis*. 2008; 52(2):227–34. <https://doi.org/10.1053/j.ajkd.2008.05.004> PMID: 18585836.
32. Seshadri S, Beiser A, Selhub J, Jacques PF, Rosenberg IH, D'Agostino RB, et al. Plasma homocysteine as a risk factor for dementia and Alzheimer's disease. *N Engl J Med*. 2002; 346(7):476–83. <https://doi.org/10.1056/NEJMoa011613> PMID: 11844848.
33. Yaffe K, Lindquist K, Penninx BW, Simonsick EM, Pahor M, Kritchevsky S, et al. Inflammatory markers and cognition in well-functioning African-American and white elders. *Neurology*. 2003; 61(1):76–80. PMID: 12847160.
34. Denny SD, Kuchibhatla MN, Cohen HJ. Impact of anemia on mortality, cognition, and function in community-dwelling elderly. *Am J Med*. 2006; 119(4):327–34. <https://doi.org/10.1016/j.amjmed.2005.08.027> PMID: 16564775.

35. da Matta SM, Janaina Matos M, Kummer AM, Barbosa IG, Teixeira AL, Silva AC. Cognitive alterations in chronic kidney disease: an update. *J Bras Nefrol.* 2014; 36(2):241–5. PMID: [25055365](#).
36. Chen G, Cai L, Chen B, Liang J, Lin F, Li L, et al. Serum level of endogenous secretory receptor for advanced glycation end products and other factors in type 2 diabetic patients with mild cognitive impairment. *Diabetes Care.* 2011; 34(12):2586–90. <https://doi.org/10.2337/dc11-0958> PMID: [22011410](#).
37. Gorska-Ciebiada M, Saryusz-Wolska M, Borkowska A, Ciebiada M, Loba J. C-Reactive Protein, Advanced Glycation End Products, and Their Receptor in Type 2 Diabetic, Elderly Patients with Mild Cognitive Impairment. *Front Aging Neurosci.* 2015; 7:209. <https://doi.org/10.3389/fnagi.2015.00209> PMID: [26578953](#).
38. Wang P, Huang R, Lu S, Xia W, Cai R, Sun H, et al. RAGE and AGEs in Mild Cognitive Impairment of Diabetic Patients: A Cross-Sectional Study. *PLoS One.* 2016; 11(1):e0145521. <https://doi.org/10.1371/journal.pone.0145521> PMID: [26745632](#).
39. Thornalley PJ. Advanced glycation end products in renal failure. *J Ren Nutr.* 2006; 16(3):178–84. <https://doi.org/10.1053/j.jrn.2006.04.012> PMID: [16825015](#).
40. Weiss MF, Erhard P, Kader-Attia FA, Wu YC, Deoreo PB, Araki A, et al. Mechanisms for the formation of glycoxidation products in end-stage renal disease. *Kidney Int.* 2000; 57(6):2571–85. <https://doi.org/10.1046/j.1523-1755.2000.00117.x> PMID: [10844627](#).
41. Mac-Way F, Couture V, Utescu MS, Ignace S, De Serres SA, Loignon RC, et al. Advanced glycation end products, aortic stiffness, and wave reflection in peritoneal dialysis as compared to hemodialysis. *Int Urol Nephrol.* 2014; 46(4):817–24. <https://doi.org/10.1007/s11255-013-0597-6> PMID: [24242737](#).
42. Kadoi Y, Saito S, Fujita N, Goto F. Risk factors for cognitive dysfunction after coronary artery bypass graft surgery in patients with type 2 diabetes. *J Thorac Cardiovasc Surg.* 2005; 129(3):576–83. <https://doi.org/10.1016/j.jtcvs.2004.07.012> PMID: [15746741](#).
43. Yaffe K, Ackerson L, Hoang TD, Go AS, Maguire MG, Ying GS, et al. Retinopathy and cognitive impairment in adults with CKD. *Am J Kidney Dis.* 2013; 61(2):219–27. <https://doi.org/10.1053/j.ajkd.2012.10.006> PMID: [23206534](#).
44. Ono T, Okita Y, Ando M, Kitamura S. Retrograde cerebral perfusion in human brains. *Lancet.* 2000; 356(9238):1323. [https://doi.org/10.1016/S0140-6736\(00\)02818-X](https://doi.org/10.1016/S0140-6736(00)02818-X) PMID: [11073023](#).
45. McGowan A, Silvestri G, Moore E, Silvestri V, Patterson CC, Maxwell AP, et al. Evaluation of the Retinal Vasculature in Hypertension and Chronic Kidney Disease in an Elderly Population of Irish Nuns. *PLoS One.* 2015; 10(9):e0136434. <https://doi.org/10.1371/journal.pone.0136434> PMID: [26327531](#).
46. Klein R, Sharrett AR, Klein BE, Chambless LE, Cooper LS, Hubbard LD, et al. Are retinal arteriolar abnormalities related to atherosclerosis?: The Atherosclerosis Risk in Communities Study. *Arterioscler Thromb Vasc Biol.* 2000; 20(6):1644–50. PMID: [10845884](#).
47. Wong TY, Klein R, Klein BE, Meuer SM, Hubbard LD. Retinal vessel diameters and their associations with age and blood pressure. *Invest Ophthalmol Vis Sci.* 2003; 44(11):4644–50. PMID: [14578380](#).
48. Wong TY, Klein R, Klein BE, Tielsch JM, Hubbard L, Nieto FJ. Retinal microvascular abnormalities and their relationship with hypertension, cardiovascular disease, and mortality. *Surv Ophthalmol.* 2001; 46(1):59–80. PMID: [11525792](#).
49. Sharrett AR, Hubbard LD, Cooper LS, Sorlie PD, Brothers RJ, Nieto FJ, et al. Retinal arteriolar diameters and elevated blood pressure: the Atherosclerosis Risk in Communities Study. *Am J Epidemiol.* 1999; 150(3):263–70. PMID: [10430230](#).
50. Wong TY, Klein R, Sharrett AR, Nieto FJ, Boland LL, Couper DJ, et al. Retinal microvascular abnormalities and cognitive impairment in middle-aged persons: the Atherosclerosis Risk in Communities Study. *Stroke.* 2002; 33(6):1487–92. PMID: [12052979](#).
51. Anstey KJ, Hofer SM, Luszcz MA. A latent growth curve analysis of late-life sensory and cognitive function over 8 years: evidence for specific and common factors underlying change. *Psychol Aging.* 2003; 18(4):714–26. <https://doi.org/10.1037/0882-7974.18.4.714> PMID: [14692859](#).
52. Farragher J, Jassal SV. Relationship between retinopathy and cognitive impairment may be confounded by visual impairment. *Am J Kidney Dis.* 2013; 61(6):1042. <https://doi.org/10.1053/j.ajkd.2012.12.037> PMID: [23684496](#).
