# Supplementary material for: An association of cognitive impairment with diabetes and retinopathy in end stage renal disease patients under peritoneal dialysis
Source: PubMed Central journal article supplement (PMC5578503; doi:10.1371/journal.pone.0183965), 2017-08-31
Supplement: pone.0183965.s001.pdf [file pone.0183965.s001.pdf]

Figure file quality report: 2017-07-19

| Original Filename | PACE Filename | Status                                                                            | Error Detail(s)                                            | PACE Adjustments                                                                                                                                               |
|-------------------|---------------|-----------------------------------------------------------------------------------|------------------------------------------------------------|----------------------------------------------------------------------------------------------------------------------------------------------------------------|
| Fig2 (1)-1        |               |  | <ul style="list-style-type: none"> <li>No Error</li> </ul> | <ul style="list-style-type: none"> <li>DOC file is converted to a TIF for submission. Please inspect the tif version for image clarity and content.</li> </ul> |
| Fig1 (5)-1        |               |  | <ul style="list-style-type: none"> <li>No Error</li> </ul> | <ul style="list-style-type: none"> <li>DOC file is converted to a TIF for submission. Please inspect the tif version for image clarity and content.</li> </ul> |
